# Supplementary material for: Bone age assessment with various machine learning techniques: A systematic literature review and meta-analysis
Source: PubMed Central journal article supplement (PMC6657881; doi:10.1371/journal.pone.0220242), 2019-07-25
Supplement: pone.0220242.s001.pdf [file pone.0220242.s001.pdf]

**S1 Table. Included studies in the systematic literature review**

|   | <b>Title</b>                                                                                                                                            | <b>Author</b>            | <b>Publication Title</b>                                                                                    | <b>Publication Year</b> | <b>Automatic or Non-Automatic BAA</b> | <b>ROI</b>  | <b>Type of image</b> |
|---|---------------------------------------------------------------------------------------------------------------------------------------------------------|--------------------------|-------------------------------------------------------------------------------------------------------------|-------------------------|---------------------------------------|-------------|----------------------|
| 1 | A new formula for assessing skeletal age in growing infants and children by measuring carpals and epiphyses of radio and ulna [31]                      | De Luca, S. et al.       | Journal of Forensic and Legal Medicine                                                                      | 2016                    | Non-Automatic                         | Wrist       | Radiograph           |
| 2 | Accurate Age Determination for Adolescents Using Magnetic Resonance Imaging of the Hand and Wrist with an Artificial Neural Network-Based Approach [34] | Tang, F. H. et al.       | Journal of Digital Imaging                                                                                  | 2018                    | Non-Automatic                         | Hand, wrist | MRI                  |
| 3 | Age prediction formulae from radiographic assessment of skeletal maturation at the knee in an Irish population [28]                                     | O'Connor, J. E. et al.   | Forensic Science International                                                                              | 2014                    | Non-Automatic                         | Knee        | Radiograph           |
| 4 | Automatic bone age assessment based on intelligent algorithms and comparison with TW3 method [35]                                                       | Liu, J. et al.           | Computerized Medical Imaging and Graphics: The Official Journal of the Computerized Medical Imaging Society | 2008                    | Automatic                             | Hand, wrist | Radiograph           |
| 5 | Bone age assessment using support vector regression with smart class mapping [15]                                                                       | Haak, D. et al.          | Proceedings of SPIE - The International Society for Optical Engineering                                     | 2013                    | Automatic                             | Hand        | Radiograph           |
| 6 | Bone age cluster assessment and feature clustering analysis based on phalangeal image rough segmentation [18]                                           | Lin, H. H. et al.        | Pattern Recognition                                                                                         | 2012                    | Automatic                             | Hand        | Radiograph           |
| 7 | Combining dental and skeletal evidence in age classification: Pilot study in a sample of Italian sub-adults [30]                                        | Pinchi, V. et al.        | Legal Medicine (Tokyo, Japan)                                                                               | 2016                    | Non-Automatic                         | Hand, wrist | Radiograph           |
| 8 | CT evaluation of timing for ossification of the medial clavicular epiphysis in a contemporary Western Australian population [29]                        | Franklin, D.; Flavel, A. | International Journal of Legal Medicine                                                                     | 2015                    | Non-Automatic                         | Clavicle    | Computer Tomography  |

|    |                                                                                                                                       |                        |                                                                           |      |               |                       |                                          |
|----|---------------------------------------------------------------------------------------------------------------------------------------|------------------------|---------------------------------------------------------------------------|------|---------------|-----------------------|------------------------------------------|
| 9  | DNA methylation markers in combination with skeletal and dental ages to improve age estimation in children [32]                       | Shi, L. et al.         | Forensic Science International. Genetics                                  | 2017 | Non-Automatic | Hand, wrist           | Radiograph                               |
| 10 | Do Secular Trends in Skeletal Maturity Occur Equally in Both Sexes? [39]                                                              | Duren, D. L. et al.    | Clinical Orthopaedics and Related Research                                | 2015 | Non-Automatic | Hand, wrist           | Radiograph                               |
| 11 | Feature description with SIFT, SURF, BRIEF, BRISK, or FREAK? A general question answered for bone age assessment [20]                 | Kashif, M. et al.      | Computers in Biology and Medicine                                         | 2016 | Automatic     | Hand                  | Radiograph                               |
| 12 | Forensic age estimation of living persons from the knee: Comparison of MRI with radiographs [36]                                      | Fan, F. et al.         | Forensic Science International                                            | 2016 | Non-Automatic | Knee                  | Radiograph, MRI                          |
| 13 | Fully Automated Deep Learning System for Bone Age Assessment [21]                                                                     | Lee, H. et al.         | Journal of Digital Imaging                                                | 2017 | Automatic     | Hand, wrist           | Radiograph                               |
| 14 | Impact of ensemble learning in the assessment of skeletal maturity [27]                                                               | Cunha, P. et al.       | Journal of Medical Systems                                                | 2014 | Non-Automatic | Hand                  | Radiograph                               |
| 15 | Magnetic resonance imaging of the sternal extremity of the clavicle in forensic age estimation: towards more sound age estimates [26] | Hillewig, E. et al.    | International Journal of Legal Medicine                                   | 2013 | Non-Automatic | Hand, wrist, clavicle | MRI (clavicle), Radiograph (hand, wrist) |
| 16 | Paediatric bone age assessment using deep convolutional neural networks [23]                                                          | Iglovikov, V.I. et al. | Lecture Notes in Computer Science                                         | 2018 | Automatic     | Hand, wrist           | Radiograph                               |
| 17 | Regression Convolutional Neural Network for Automated Pediatric Bone Age Assessment from Hand Radiograph [24]                         | Ren, X. et al.         | IEEE journal of biomedical and health informatics                         | 2018 | Automatic     | Hand, wrist           | Radiograph                               |
| 18 | Relative Skeletal Maturation and Population Ancestry in Nonobese Children and Adolescents [40]                                        | McCormack, S.E. et al. | Journal of Bone and Mineral Research                                      | 2017 | Non-Automatic | Hand, wrist           | Radiograph                               |
| 19 | Simplified radius, ulna, and short bone-age assessment procedure using grouped-Tanner-Whitehouse method [38]                          | Hsieh, C. et al.       | Pediatrics International: Official Journal of the Japan Pediatric Society | 2011 | Non-Automatic | Hand, wrist           | Radiograph                               |
| 20 | Skeletal age estimation in a contemporary Western Australian population using the Tanner-Whitehouse method [33]                       | Maggio, A. et al.      | Forensic Science International                                            | 2016 | Non-Automatic | Hand, wrist           | Radiograph                               |

|    |                                                                                                                      |                         |                                                              |      |               |             |            |
|----|----------------------------------------------------------------------------------------------------------------------|-------------------------|--------------------------------------------------------------|------|---------------|-------------|------------|
| 21 | Skeletal maturation in Indonesian and white children assessed with hand-wrist and cervical vertebrae methods [37]    | Soegiharto, B.M. et al. | American Journal of Orthodontics and Dentofacial Orthopedics | 2008 | Non-Automatic | Hand, wrist | Radiograph |
| 22 | Support vector machine classification based on correlation prototypes applied to bone age assessment [25]            | Harmsen, M. et al.      | IEEE journal of biomedical and health informatics            | 2013 | Automatic     | Hand        | Radiograph |
| 23 | The BoneXpert method for automated determination of skeletal maturity [17]                                           | Thodberg, H.H. et al.   | IEEE transactions on medical imaging                         | 2009 | Automatic     | Hand, wrist | Radiograph |
| 24 | The persistence of epiphyseal scars in the distal radius in adult individuals [41]                                   | Davies, C. et al.       | International Journal of Legal Medicine                      | 2016 | Non-Automatic | Wrist       | Radiograph |
| 25 | Versatile Framework for Medical Image Processing and Analysis with Application to Automatic Bone Age Assessment [22] | Zhao, C. et al.         | Journal of Electrical and Computer Engineering               | 2018 | Automatic     | Hand        | Radiograph |
| 26 | What automated age estimation of hand and wrist MRI data tells us about skeletal maturation in male adolescents [19] | Urschler, M. et al.     | Annals of Human Biology                                      | 2015 | Automatic     | Hand, wrist | MRI        |

**BAA, Bone Age Assessment; ROI, Region of Interest; MRI, Magnetic Resonance Imaging.**
